# Supplementary material
Source: Springer Nature journal article supplement (https://www.springermedizin.de/resource/supplementary/12958_2010_688_MOESM7_ESM.pdf/9568590)
Supplement: MOESM7 [file 9568590]

IL11 (ng/ml)

**A**

cont 1 10 100 500

ECC-1

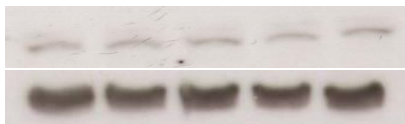

SOCS3

b-actin

**B**

cont 1 10 100 500

HEC-1A

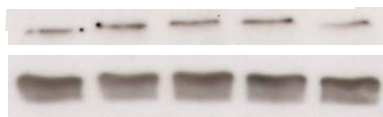

SOCS3

b-actin

**C**

cont 1 10 100 500

Ishikawa

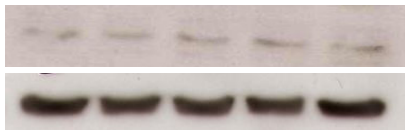

SOCS3

b-actin

**D**

IL11ant

cont 100<sup>†</sup> 1 10 100 500

HES

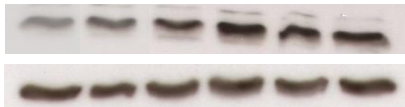

SOCS3

b-actin
